# Supplementary material for: Multiple Mycotoxin Contamination in Medicinal Plants Frequently Sold in the Free State Province, South Africa Detected Using UPLC-ESI-MS/MS
Source: MDPI journal article supplement (doi:10.3390/toxins14100690), 2022-10-08
Supplement: s1 [file s1]

# Supplementary Materials: Multiple Mycotoxin Contamination in Medicinal Plants Frequently Sold in the Free State Province, South Africa Detected Using UPLC-ESI-MS/MS

Julius Ndoro, Idah Tichaidza Manduna, Makomborero Nyoni and Olga de Smidt

**Table S1.** Medicinal plants screened for mycotoxins.

| Scientific Name                                            | Family          | Local Name                 | FI (%) | Sample      | Location           |
|------------------------------------------------------------|-----------------|----------------------------|--------|-------------|--------------------|
| <i>Hypoxis hemerocallidea</i> Fisch., C.A.Mey. & Avé-Lall. | Hypoxidaceae    | Ilabatheka / Moli          | 38     | MS11        | Dewetsdorp         |
| <i>Dicoma anomala</i> Sond.                                | Asteraceae      | Hloenya                    | 33     | SV07        | Zastron            |
| <i>Elephantorrhiza elephantina</i> Burch. Skeels           | Fabaceae        | Mosetsane                  | 31     | SV10        | Bethlem            |
| <i>Helichrysum odoratissimum</i> L. Sweet                  | Asteraceae      | Mpepa                      | 31     | SV14        | Kroonstad          |
| <i>Tulbaghia alliacea</i> L.f.                             | Alliaceae       | Umwelela / Molela          | 25     | MS10        | Dewetsdorp         |
| <i>Pentanisia prunelloides</i> Klotzsch ex Eckl. & Zeyh.   | Rubiaceae       | Setima-mollo               | 23     | SV02        | Bloemfontein       |
| <i>Bulbine narcissifolia</i> Salm-Dyck                     | Asphodelaceae   | Kgomo-ea - balisa          | 19     | MS13        | Thaba Nchu         |
| <i>Alepidea amatymbica</i> Eckl. & Zeyh                    | Apiaceae        | Lesoko                     | 19     | MS15 & SV19 | Welkom & Bethlehem |
| <i>Xysmalobium undulatum</i> L.                            | Apocynaceae     | Poho-tshehla/Pohotsh ehele | 19     | SV04        | Thaba 'Nchu        |
| <i>Clivia miniata</i> (Lindl.) Regel                       | Amaryllidaceae  | Umayime                    | 17     | MS05        | Sasolburg          |
| <i>Eucomis autumnalis</i> Mill. Chitt.                     | Asparagaceae    | Umathunga                  | 17     | MS07        | Qwaqwa             |
| <i>Aloe ferox</i> Mill.                                    | Asphodelaceae   | Khala                      | 15     | MS04        | Senekal            |
| <i>Drimia depressa</i> Baker Jessop                        | Hyacinthaceae   | Moretele                   | 15     | MS16        | Sasolburg          |
| <i>Talinum caffrum</i> Thunb                               | Portulacaceae   | Punyuka bamphethe/khutsana | 13     | MS02        | Parys              |
| <i>Euclea coriacea</i> A.DC.                               | Ebenaceae       | Monna-mots'o               | 13     | SV08 & SV18 | Qwaqwa             |
| <i>Dianthus basuticus</i> Burt Davy                        | Caryophyllaceae | Hlokoa-la-tsela            | 13     | SV16        | Kroonstad          |
| <i>Pappea capensis</i> Eckl. & Zeyh                        | Sapindaceae     | Voma                       | 11     | SV15        | Welkom             |
| <i>Adenia gummiifera</i> Harv. Harms                       | Passifloraceae  | Impinda                    | 10     | MS06        | Sasolburg          |
| <i>Cussonia paniculata</i> Eckl. & Zeyh                    | Araliaceae      | Moretseng/Mots 'ets'e      | 10     | SV11        | Senekal            |
| <i>Helichrysum caespititium</i> DC                         | Asteraceae      | Phate-ea-ngaka             | 10     | SV12        | Parys              |
| <i>Podocarpus henkelii</i> Stapf ex Dallim. & Jacks        | Podocarpaceae   | Vhulakhuvhali we           | 10     | SV17        | Kroonstad          |
| <i>Galium capense</i> Thunb                                | Rubiaceae       | Mabona                     | 10     | MS03        | Winbrug            |
| <i>Crotalaria natalia</i> Meisn                            | Fabaceae        | Uvelabahleke               | 10     | MS08        | Ladybrand          |
| <i>Scabiosa columbaria</i> L.                              | Dipsacaceae     | Selomi                     | 10     | MS09        | Ladybrand          |

---

|                                                        |               |               |    |      |              |
|--------------------------------------------------------|---------------|---------------|----|------|--------------|
| <i>Hermannia depressa</i> N.E.Br.                      | Malvaceae     | Seletjane     | 10 | MS12 | Bultfontein  |
| <i>Leucosidea sericea</i> Eckl. & Zeyh.                | Rosaceae      | Cheche        | 10 | MS14 | Bloemfontein |
| <i>Sclerochiton ilicifolius</i> A.Meeuse               | Acanthaceae   | Molomo monate | 10 | SV01 | Welkom       |
| <i>Curtisia dentata</i> Burm.f. C.A.Sm.                | Cornaceae     | Tshwene       | 10 | SV09 | Bethlem      |
| <i>Siphonochilus aethiopicus</i> Schweif. B.L.<br>Burt | Zingiberaceae | Isiphepheto   | 10 | SV13 | Kroonstad    |

---

FI–Frequency Index; SV–Street Vendor; MS–Muthi Shop

**Modify ACQUITY Binary Solvent Manager Instrument Method**

Acquity Binary Solvent Manager  
Ultra Performance LC

Run Time: 14.00 min

General | Data | Analog Out | Events

**Solvents**

A1: Water + 0.1% formic ac ...

B1: Acetonitrile + 0.1% form ...

**Pressure Limits**

Low: 0 psi

High: 15000 psi

Seal Wash: 5.0 min

**Gradient**

|   | Time (min) | Flow (mL/min) | %A   | %B    | Curve   |
|---|------------|---------------|------|-------|---------|
| 1 | Initial    | 0.350         | 98.0 | 2.0   | Initial |
| 2 | 0.50       | 0.350         | 98.0 | 2.0   | 6       |
| 3 | 7.00       | 0.350         | 60.0 | 40.0  | 6       |
| 4 | 10.00      | 0.350         | 30.0 | 70.0  | 6       |
| 5 | 11.00      | 0.350         | 5.0  | 95.0  | 6       |
| 6 | 12.00      | 0.350         | 0.0  | 100.0 | 6       |

Comment:

OK Cancel

**Figure S1.** Gradient elution program for Liquid Chromatography Tandem Mass Spectrometry.
